# Supplementary material
Source: ML conference proceedings conference paper supplement (https://proceedings.neurips.cc/paper_files/paper/2022/hash/5b4a459db23e6db9be2a128380953d96-Abstract.html)
Supplement: Supplementary file 1 [file 5b4a459db23e6db9be2a128380953d96-Supplemental-Conference.zip]

Archive with 1 entries (1 files):
- NIPS2022_HDN_supplementary.pdf
